# Supplementary material for: WS2 nanosheets functionalized by biomimetic lipids with enhanced dispersibility for photothermal and chemo combination therapy
Source: Royal Society of Chemistry journal article supplement (doi:10.1039/c9tb01604j), 2020-01-01
Supplement: c9tb01604j1.pdf [file c9tb01604j1.pdf]

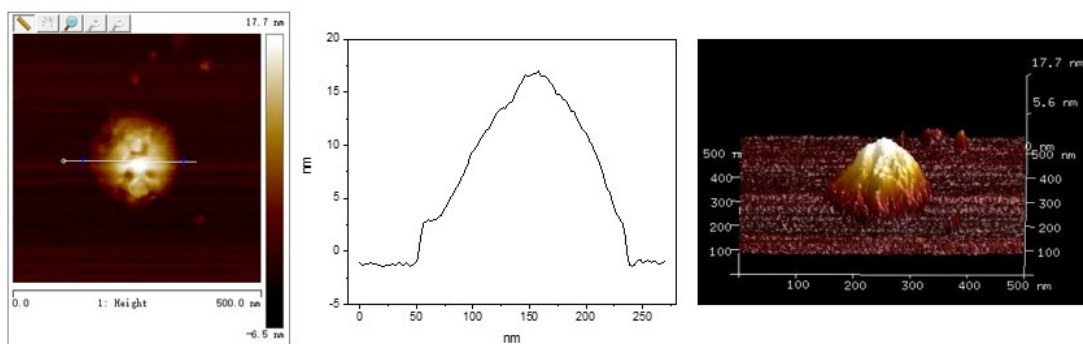

Fig. S1. 2D AFM image and 3D AFM image of WS<sub>2</sub>-lipid.

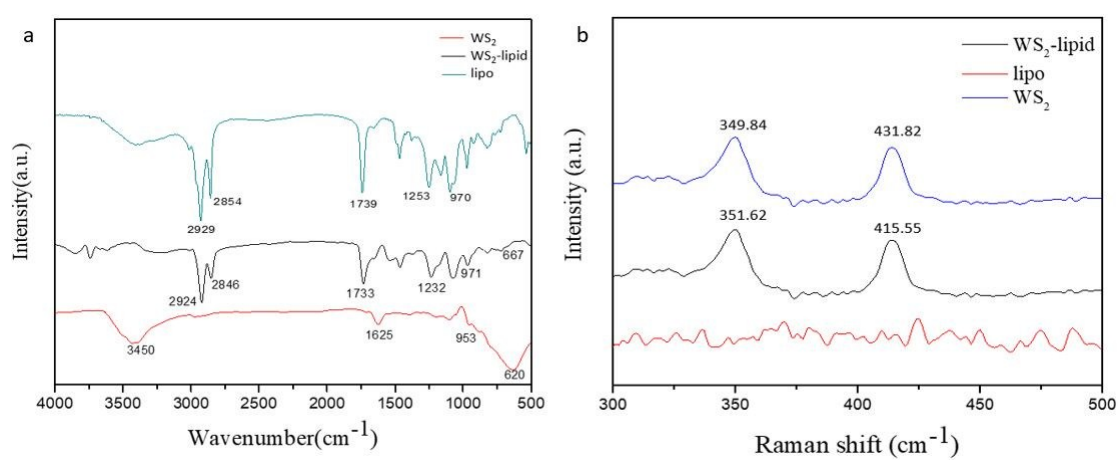

Fig S2. FTIR (a) and Raman (b) of WS<sub>2</sub>, liposome and WS<sub>2</sub>-lipid.

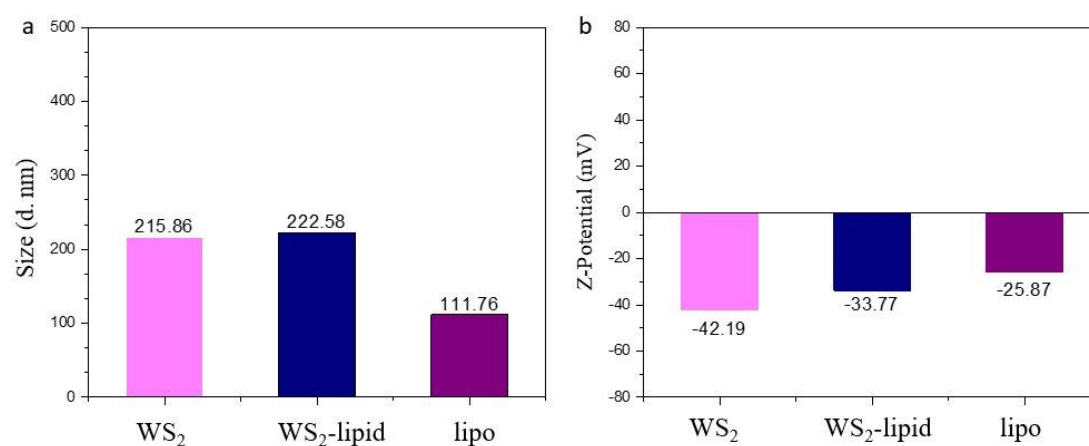

Fig S3. Particle size (a) and Zeta potential (b) of WS<sub>2</sub> and WS<sub>2</sub>-lipid

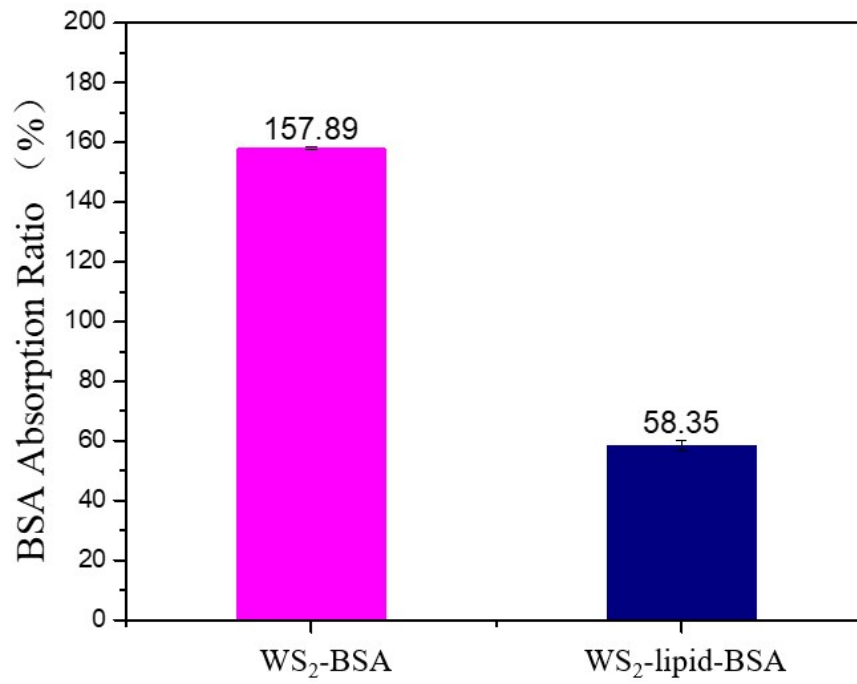

Fig S4. BSA absorption ratio of WS<sub>2</sub> and WS<sub>2</sub>-lipid

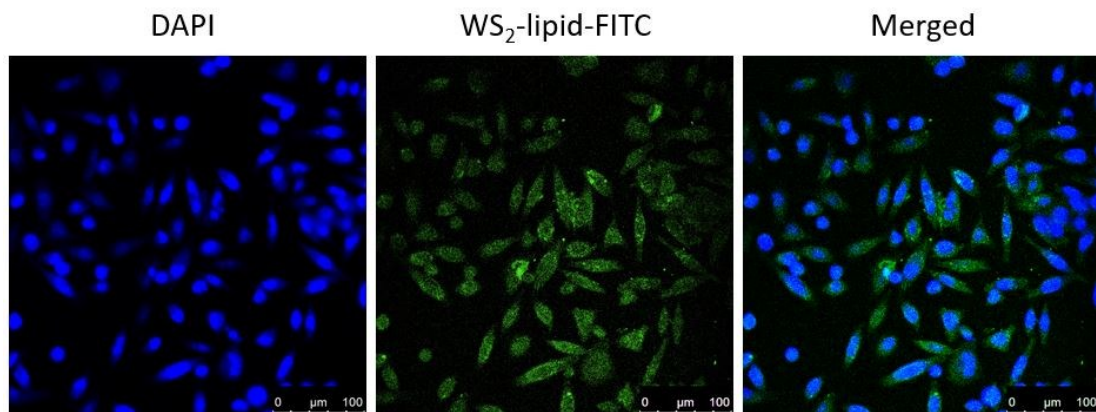

Fig.S5.Fluorescence image of WS<sub>2</sub>-lipid cell uptake by MDA-MB-231.
